# Supplementary material for: Kinetics-controlled synthesis of gold–silver nanosheets with abundant in-plane cracking and their trimetallic derivatives for plasmon-enhanced catalysis
Source: Royal Society of Chemistry journal article supplement (doi:10.1039/d1ce01505b), 2022-01-01
Supplement: d1ce01505b1.pdf [file d1ce01505b1.pdf]

Supporting Information for

## **Kinetics-Controlled Synthesis of Gold-Silver Nanosheets with Abundant in-Plane Cracking and Their Trimetallic Derivatives for Plasmon-Enhanced Catalysis**

Yiqun Zheng,<sup>a\*</sup> Gongguo Zhang,<sup>a</sup> Yanyun Ma,<sup>b\*</sup> Yuhan Kong, Feng Liu,<sup>c</sup> and Maochang Liu<sup>c</sup>

<sup>a</sup> School of Chemistry, Chemical Engineering, and Materials, Jining University, Qufu, Shandong 273155, P. R. China

<sup>b</sup> Institute of Functional Nano & Soft Materials (FUNSOM), Jiangsu Key Laboratory for Carbon-Based Functional Materials & Devices, Soochow University, Suzhou, Jiangsu 215123, P. R. China

<sup>d</sup> International Research Center for Renewable Energy, National Key Laboratory of Multiphase Flow in Power Engineering, Xi'an Jiaotong University, Xi'an, Shaanxi 710049, China

\*Corresponding author: Prof. Y. Zheng, [whzyq@163.com](mailto:whzyq@163.com); Prof. Y. Ma, [mayanyun@suda.edu.cn](mailto:mayanyun@suda.edu.cn)

Number of Figure: 16

Number of Page: 17

Number of Table: 1

## Table of Content

**Figure S1.** SEM image of the AuAg branched nanosheets.

**Figure S2.** Wide XPS spectrum of the AuAg branched nanosheets.

**Figure S3.** EDS spectrum of the AuAg branched nanosheets as shown in Figure 2.

**Figure S4.** TEM images showing the effect of injection rate of metal precursor on the AuAg product morphology.

**Figure S5.** TEM images showing the effect of reaction temperature on the AuAg product morphology.

**Figure S6.** TEM images showing the effect of Au/Ag molar ratio in precursor on the AuAg product morphology.

**Figure S7.** TEM images showing the effect of OTAC amount on the AuAg product morphology.

**Figure S8.** Wide XPS spectrum of the Au@PdAg nanosheets.

**Figure S9.** Wide XPS spectrum of the AuAgPt nanosheets.

**Figure S10.** EDS spectrum of the AuAgPd nanosheets as shown in Figure 4.

**Figure S11.** EDS spectrum of the AuAgPt nanosheets as shown in Figure 5.

**Figure S12.** XRD pattern of the AuAgPd nanosheets as shown in Figure 4.

**Figure S13.** XRD pattern of the AuAgPt nanosheets as shown in Figure 5.

**Figure S14.** Time-dependent UV-vis extinction spectra recorded under different irritation conditions using different metallic catalysts.

**Figure S15.** Plots showing c) the absorbance and d)  $\ln(I_0/I_t)$  versus reaction time under different irritation conditions using different metallic catalysts.

**Figure S16.** Experimental results for the UV-vis light-assisted reduction of 4-NP with no catalyst present.

**Table S1.** XRD results and theoretical diffraction peak positions of the AuAgPd and AuAgPt nanosheets.

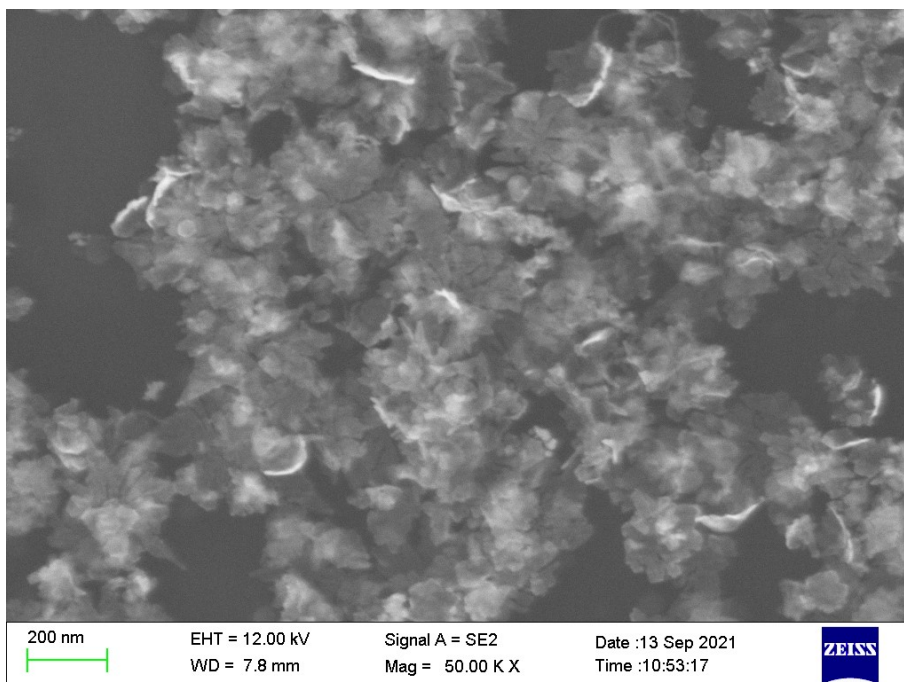

**Figure S1.** SEM image of AuAg branched nanosheets captured in another typical region.

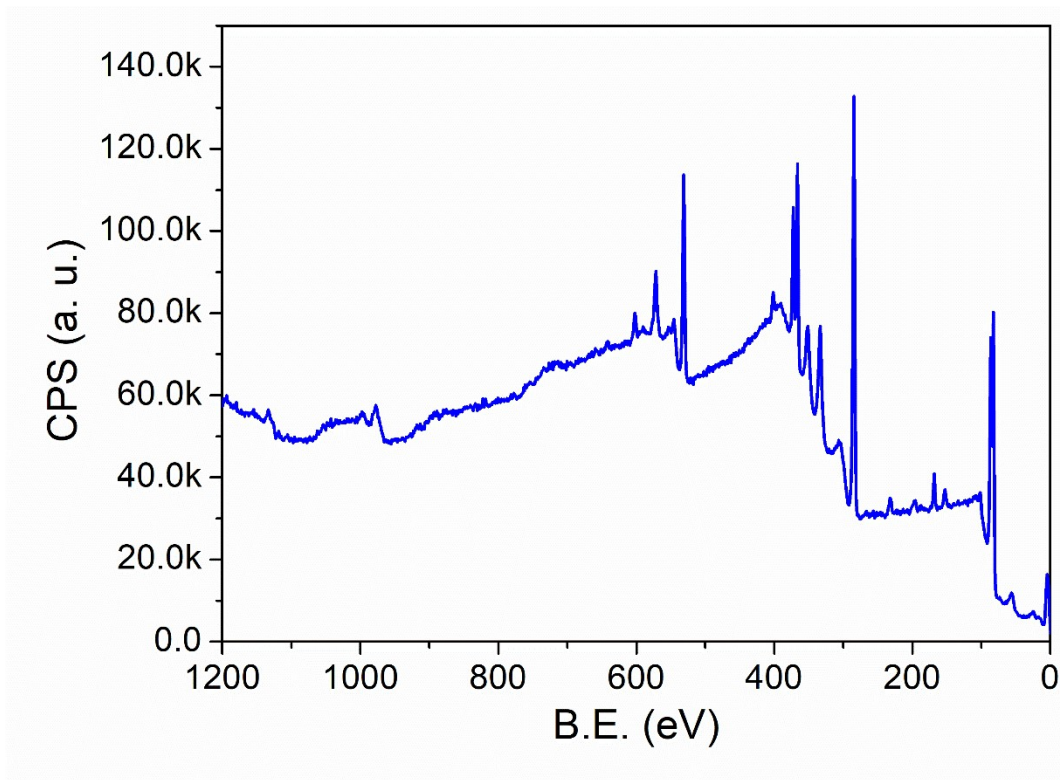

**Figure S2.** Wide XPS spectrum of the AuAg branched nanosheets.

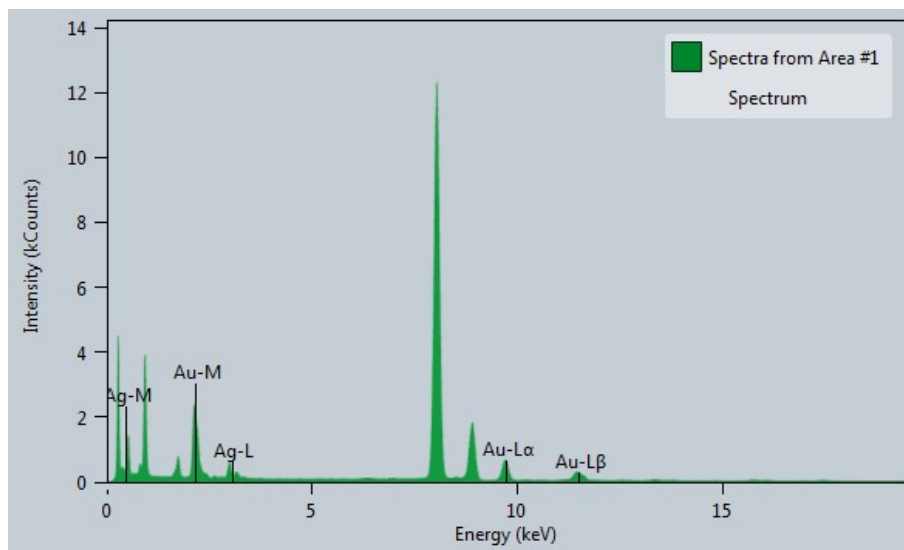

**Figure S3.** EDS spectrum of AuAg branched nanosheets as shown in Figure 2. The atomic molar ratio of Au:Ag was determined to be 67.9:32.1.

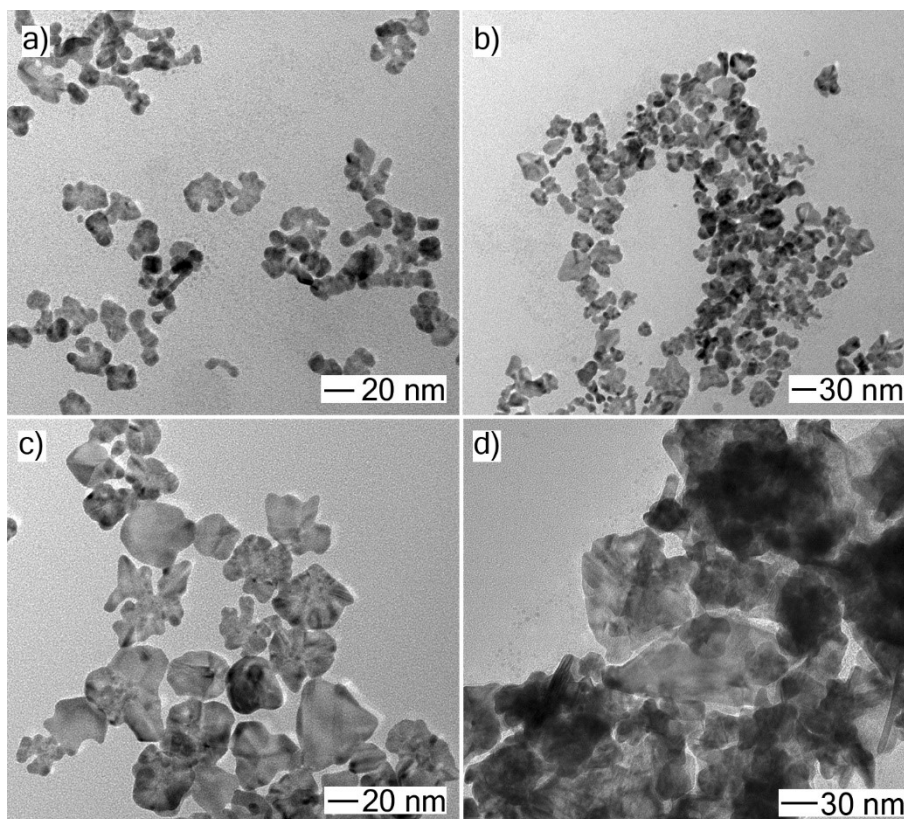

**Figure S4.** Effect of injection rate of metal precursor on AuAg product morphology. TEM images of products obtained *via* the P1 standard procedure, except that the Au-Ag precursor solution was dropwise added using a syringe pump at the injection rate of 4 mL/h, and the volume was controlled to a) 0.5 mL, b) 1 mL, c) 2 mL, and d) 4 mL, respectively.

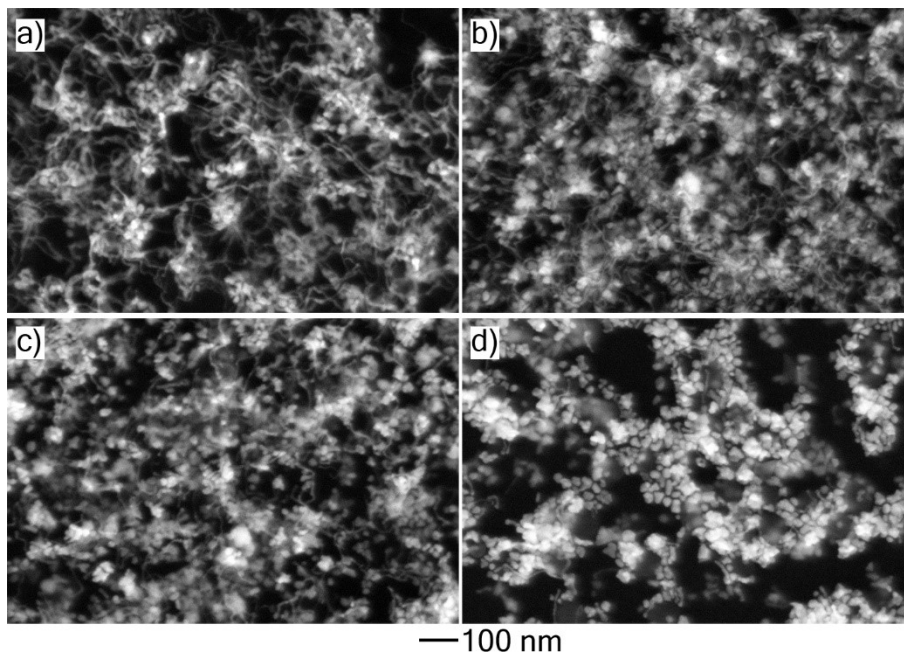

**Figure S5.** Effect of reaction temperature on AuAg product morphology. SEM images of products obtained *via* the standard procedure, except that the reaction temperature was set as 27 °C (room temperature) and the Au-Ag precursor solution was a) one-shot added and b-e) dropwise added using a syringe pump at the injection rate of c) 12 mL/h, d) 4 mL/h, and e) 2 mL/h, respectively.

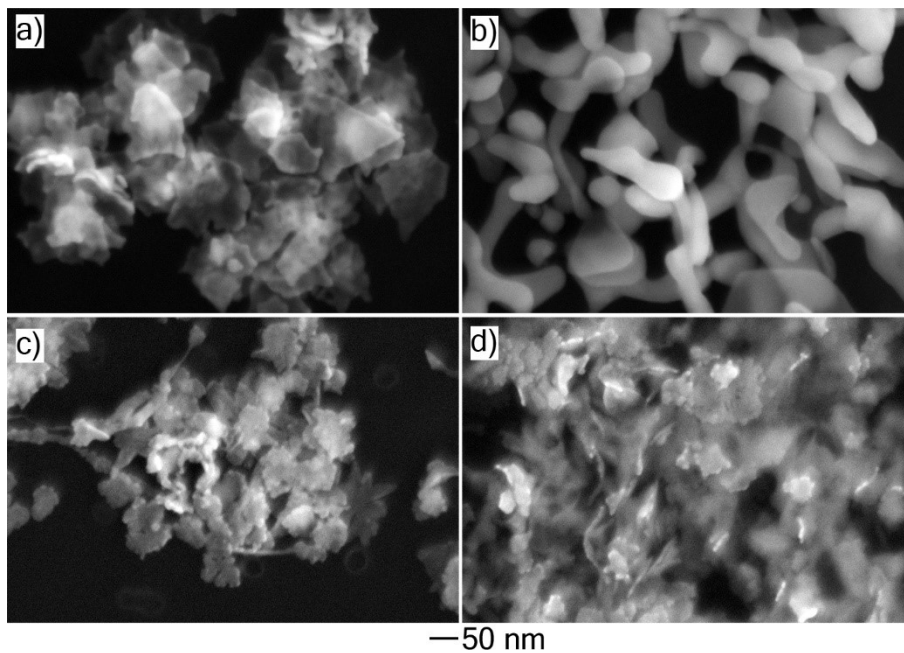

**Figure S6.** Effect of Au/Ag molar ratio in precursor on AuAg product morphology. SEM images of products obtained *via* the standard procedure, except that the injection rate was set at 12 mL/h and the concentration of precursor solution was varied to a) 0.5 mM H<sub>AuCl</sub><sub>4</sub>, b) 0.5 mM AgNO<sub>3</sub>, c) 0.25 mM H<sub>AuCl</sub><sub>4</sub>+0.25 mM AgNO<sub>3</sub>, d) 0.125 mM H<sub>AuCl</sub><sub>4</sub>+0.375 mM AgNO<sub>3</sub>, respectively.



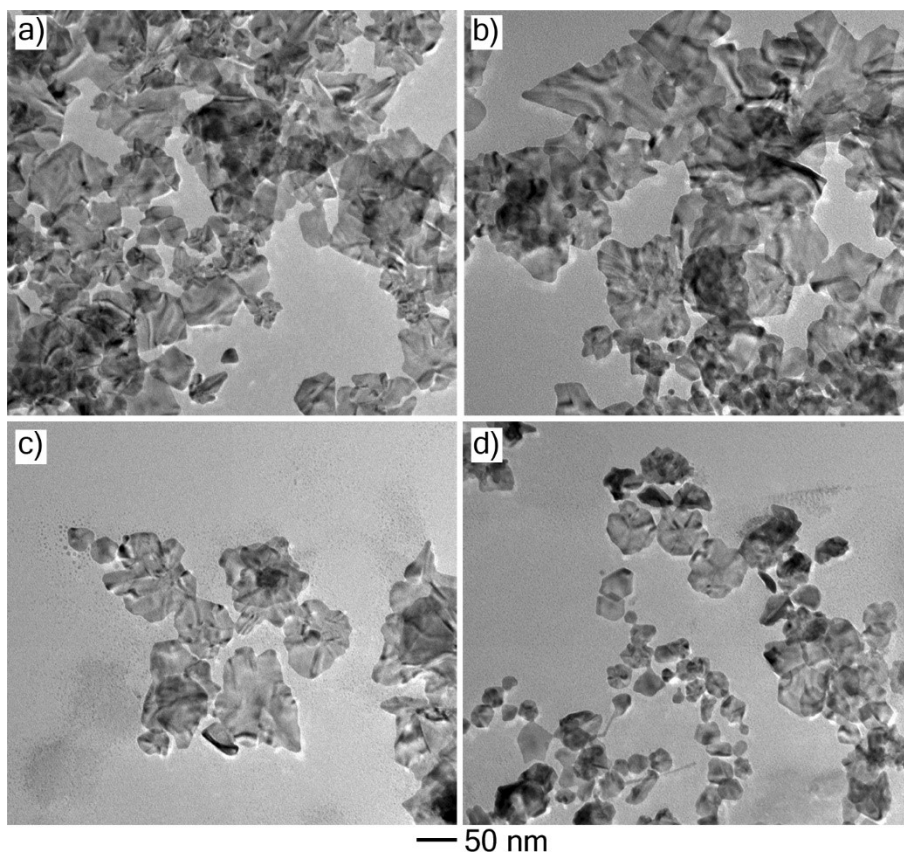

**Figure S7.** Effect of OTAC amount on AuAg product morphology. TEM images of AuAg products obtained *via* the standard procedure, except that the amount of OTAC was varied from 1000  $\mu\text{mol}$  to a) 400, b) 200, c) 100, and d) 50  $\mu\text{mol}$ , respectively.

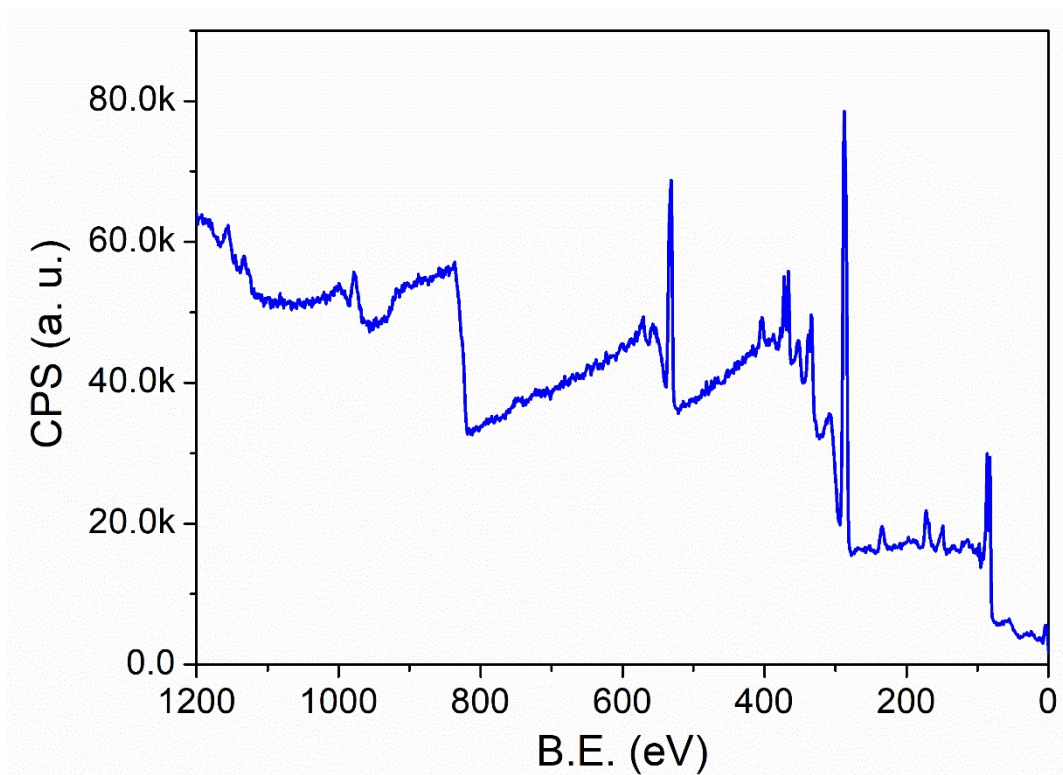

**Figure S8.** Wide XPS spectrum of the Au@PdAg nanosheets.

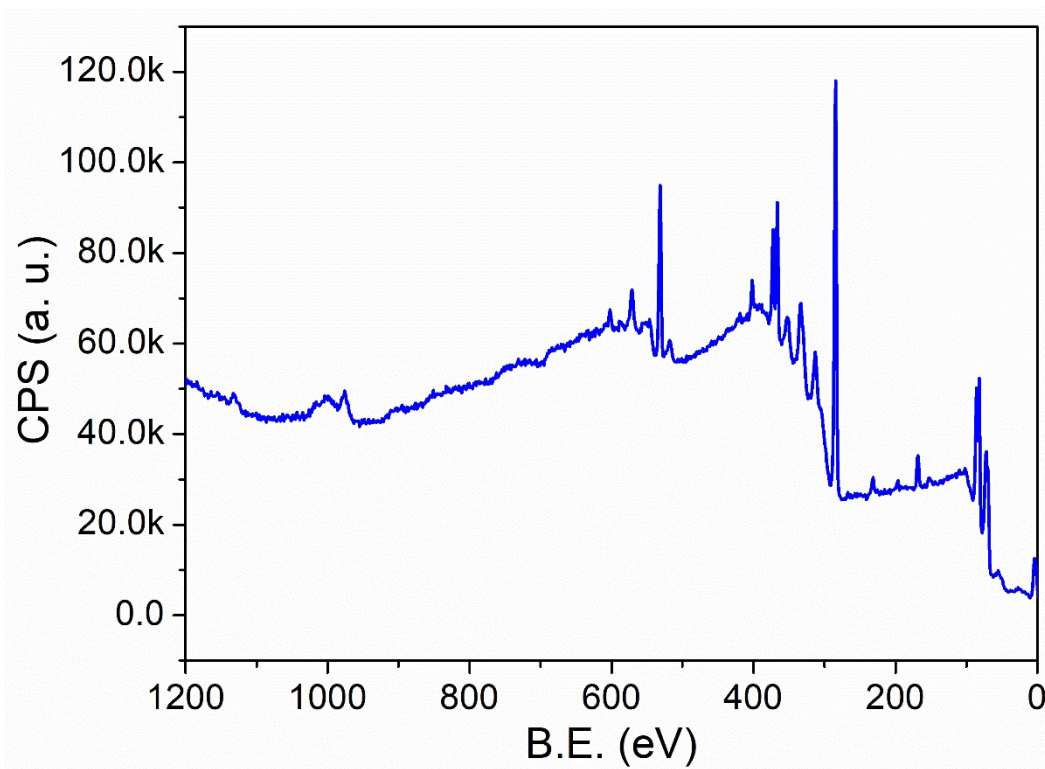

**Figure S9.** Wide XPS spectrum of the AuAgPt nanosheets.

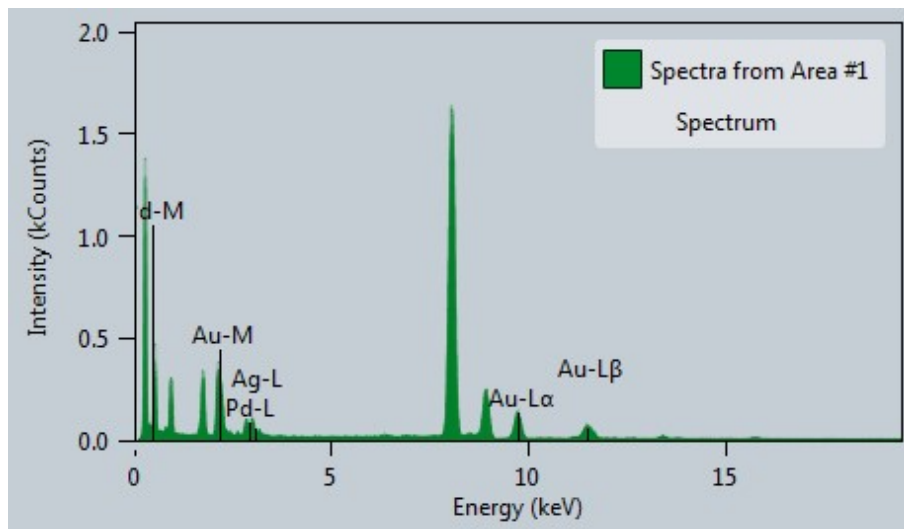

**Figure S10.** EDS spectrum of AuAgPd nanosheets as shown in Figure 4. The atomic molar ratio of Pd:Ag:Au was determined to be 22.7:14.6:62.7.

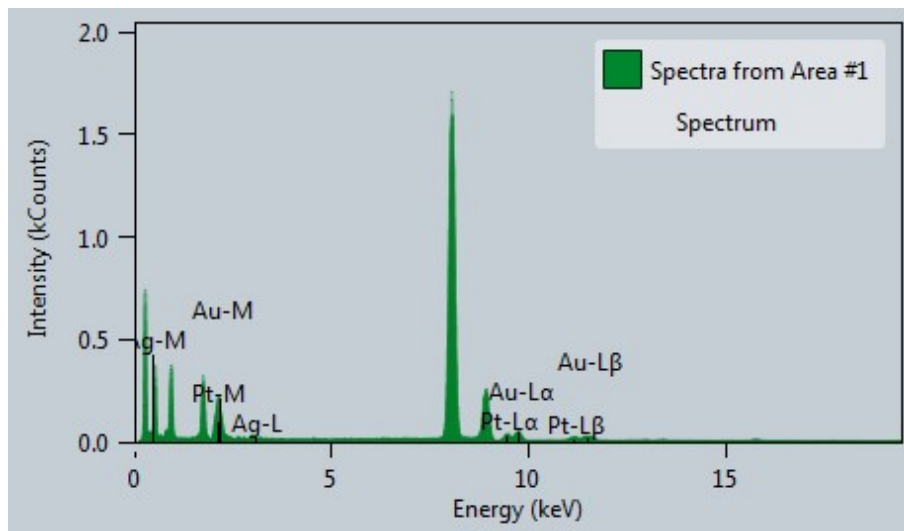

**Figure S11.** EDS spectrum of AuAgPt nanosheets as shown in Figure 5. The atomic molar ratio of Pt:Ag:Au was determined to be 33.2:14.1:52.7.

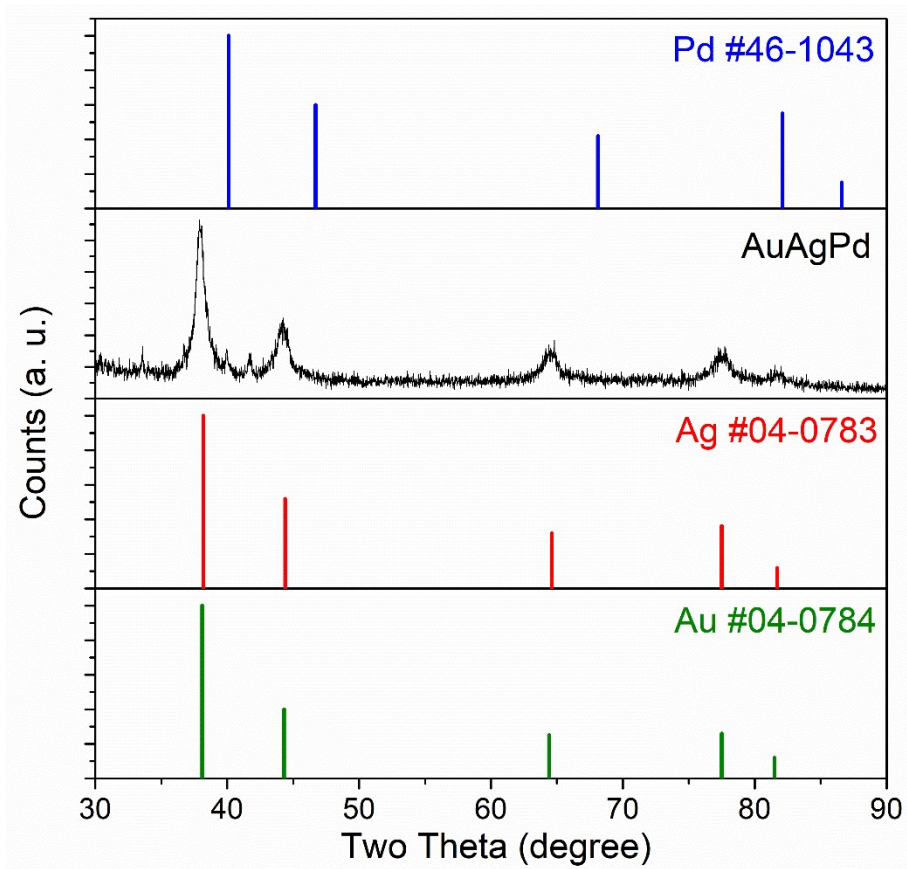

**Figure S12.** XRD pattern of AuAgPd nanosheets as shown in Figure 4. Data of *fcc*-Au (JCPDS No. 04-0784), *fcc*-Ag (JCPDS No. 04-0783), and *fcc*-Pd (JCPDS No. 46-1043) was provided for reference.

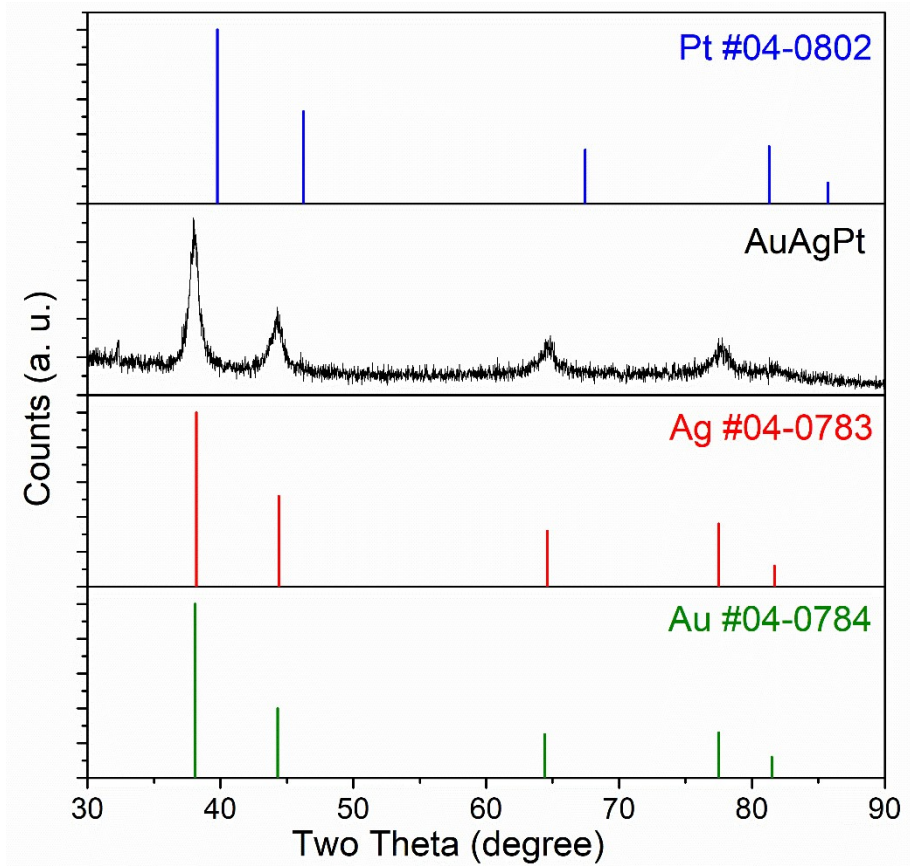

**Figure S13.** XRD pattern of AuAgPt nanosheets as shown in Figure 5. Data of *fcc*-Au (JCPDS No. 04-0784), *fcc*-Ag (JCPDS No. 04-0783), and *fcc*-Pt (JCPDS No. 04-0802) was provided for reference.



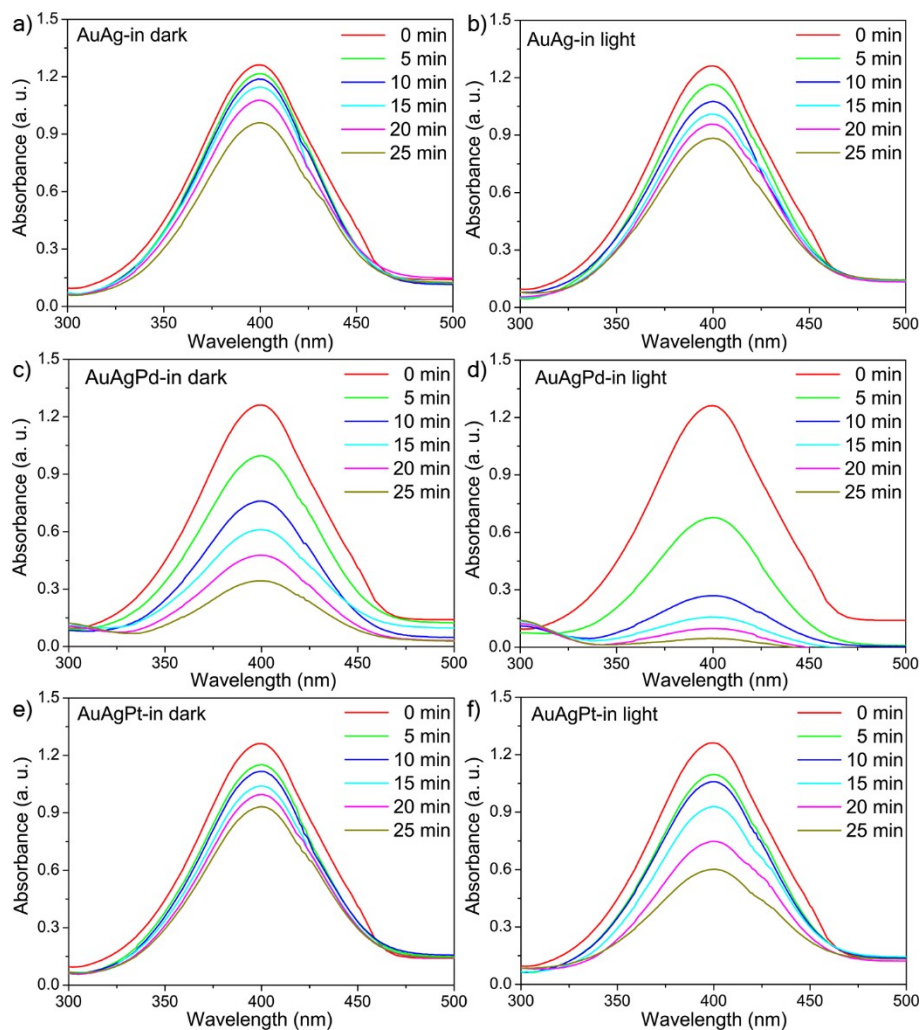

**Figure S14.** Time-dependent UV-vis extinction spectra recorded a, c, e) in light and b, d, f) in dark. Catalysts: a, b) AuAg; c, d) AuAgPd; e, f) AuAgPt. Condition:  $[\text{NaBH}_4] = 66.7 \text{ mM}$ ,  $[\text{4-NP}] = 0.07 \text{ mM}$ , mass amount of catalyst =  $40 \mu\text{g}$ , total volume =  $15 \text{ mL}$ .



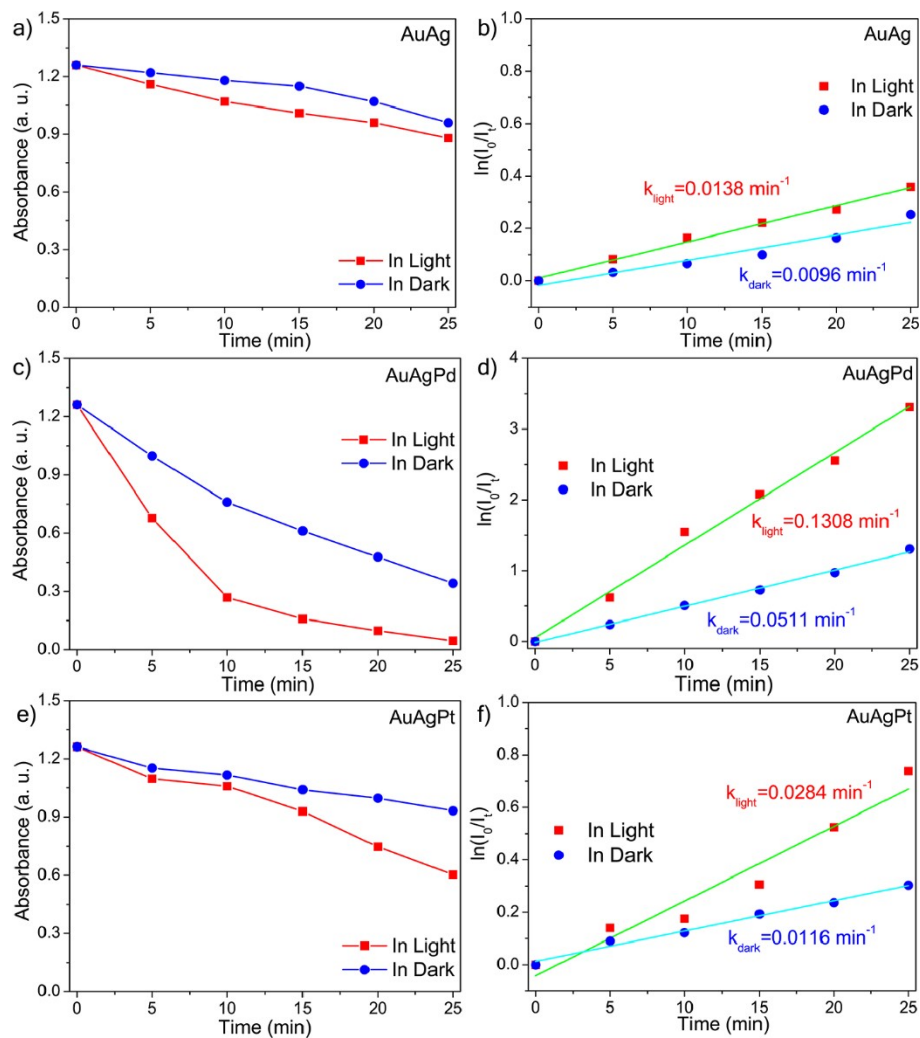

**Figure S15.** Plots showing c) the absorbance and d)  $\ln(I_0/I_t)$  versus reaction time measured a, c, e) in light and b, d, f) in dark. Catalysts: a, b) AuAg; c, d) AuAgPd; e, f) AuAgPt. Condition:  $[\text{NaBH}_4] = 66.7 \text{ mM}$ ,  $[\text{4-NP}] = 0.07 \text{ mM}$ , mass amount of catalyst =  $40 \mu\text{g}$ , total volume =  $15 \text{ mL}$ .

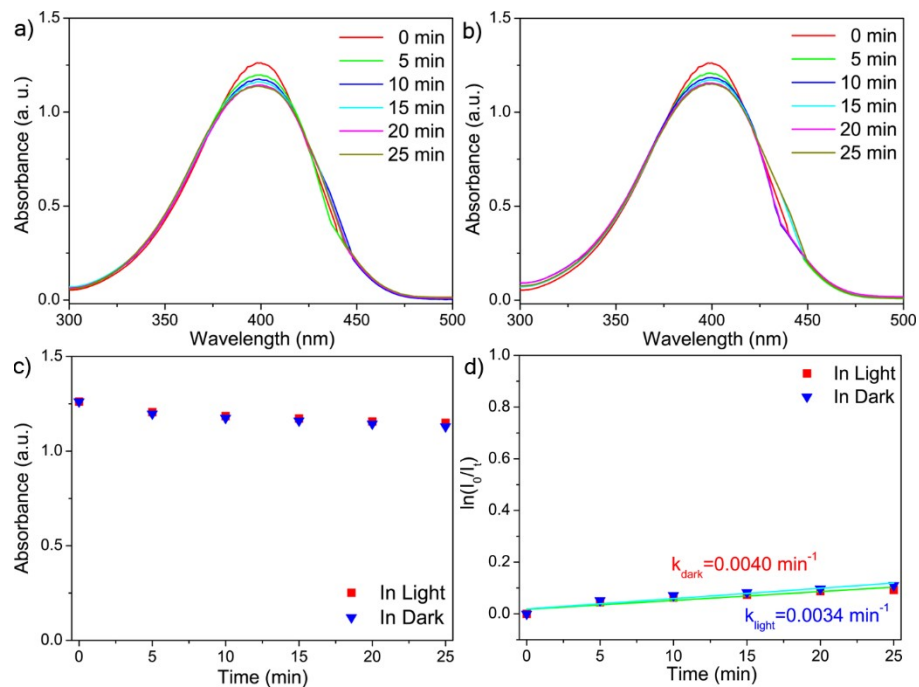

**Figure S16.** Experimental results for the UV-vis light-assisted reduction of 4-NP with no catalyst present: a, b) Time-dependent UV-vis extinction spectra recorded a) in dark and b) in light; c, d) Plots showing c) the absorbance and d)  $\ln(I_0/I_t)$  versus reaction time. Condition:  $[\text{NaBH}_4] = 66.7 \text{ mM}$ ,  $[\text{4-NP}] = 0.07 \text{ mM}$ , total volume = 15 mL.

**Table S1.** XRD results and theoretical diffraction peak positions of as-prepared  $\text{Au}_{62.7}\text{Ag}_{14.6}\text{Pd}_{22.7}$  and  $\text{Au}_{52.7}\text{Ag}_{14.1}\text{Pt}_{33.2}$  nanosheets.

|                                                    |                   | Diffraction Peak Position (°) |       |       |       |
|----------------------------------------------------|-------------------|-------------------------------|-------|-------|-------|
|                                                    |                   | (111)                         | (200) | (220) | (311) |
| $\text{Au}_{62.7}\text{Ag}_{14.6}\text{Pd}_{22.7}$ | XRD               | 37.9                          | 44.2  | 64.6  | 77.5  |
|                                                    | Theoretical*      | 38.6                          | 44.9  | 65.4  | 78.5  |
| $\text{Au}_{52.7}\text{Ag}_{14.1}\text{Pt}_{33.2}$ | XRD               | 38.0                          | 44.3  | 64.7  | 77.6  |
|                                                    | Theoretical*      | 38.7                          | 45.0  | 65.5  | 78.8  |
| Pd                                                 | JCPDS No. 46-1043 | 40.1                          | 46.7  | 68.1  | 82.1  |
| Pt                                                 | JCPDS No. 04-0802 | 39.8                          | 46.2  | 67.5  | 81.3  |
| Au                                                 | JCPDS No. 04-0784 | 38.2                          | 44.4  | 64.6  | 77.5  |
| Ag                                                 | JCPDS No. 04-0783 | 38.1                          | 44.3  | 64.4  | 77.5  |

\*The theoretical value was calculated using Vegard's Law.
